# Supplementary material
Source: Research Square preprint supplement (doi:10.21203/rs.3.rs-9137132/v1)
Supplement: Supplementary file 1 [file 51f7279e3d91411000c578d9.xlsx]

## Sheet: dataset
Ability group	IRCRA level	Age (years)	Height (cm)	Body mass (kg)	Dominant limb	StO2 HTR D 0° (s)	StO2 HTR D 180° (s)	StO2 rate D 0° (%/s)	StO2 rate D 180° (%/s)	StO2 HTR N 0° (s)	StO2 HTR N 180° (s)	StO2 rate N 0° (%/s)	StO2 rate N 180° (%/s)
1	11	37	175	71	R	10.7	33.4	1.4	0.4	10	41.7	1.3	0.3
1	13	31	173	71	R	19.6	17.4	0.8	1	12.4	32.2	1.4	0.4
1	13	27	179	83	R	9.8	19.9	1.8	0.7	7.9	20.9	1.9	0.8
1	14	27	175	72	R	4	11.5	2.5	1.9	5	18.6	3.9	0.8
1	15	25	176.5	73.5	R	11.2	22.5	1.2	0.6	11	21.8	1.2	0.7
1	15	31	186	78	L	9.5	22.4	1.5	0.5	8.6	13.4	1.9	0.6
1	15	26	170	72	R	10.2	13.6	1.5	1.4	7.5	14.2	2.7	1.1
1	16	18	173	62	R	8.5	33.1	1.7	0.5	8.1	22.2	1.9	0.7
1	16	25	183	75	R	9.2	35.6	2	0.5	7.9	45.7	2.5	0.4
1	17	22	182	85	R	9.6	15.6	1.9	0.9	12.8	67.4	1	0.2
1	14	23	178	68	R	7.4	29.5	1.7	0.5	7	19.4	1.5	0.9
1	14	26	180	83	R	13.6	161.9	1.2	0.1	14.1	122.6	1	0.1
1	13	23	173	75	R	14.4	25.4	0.8	0.5	11.8	24.7	1.5	0.7
1	11	24	172	76	R	11.4	35.5	1.6	0.5	8.3	26.8	2.9	0.7
1	13	23	180	76	R	8.7	71.8	2.2	0.1	9.1	61.3	1.7	0.3
1	12	24	173	70	R	9.5	63.9	1.7	0.2	9.1	15.8	1.9	1
1	11	24	178	75	R	10.5	24.8	1.2	0.6	14.9	25.3	1	0.7
1	12	24	178	75	R	10.1	19.2	1.6	0.9	11.4	17.6	1.4	1
1	11	24	178	75	R	8.1	21.7	1.2	0.6	8.1	21.5	1.3	0.6
1	13	24	178	75	R	14.4	20.3	1.2	0.6	13.3	24.9	1.4	0.7
1	15	24	178	75	R	13.6	35.6	0.9	0.3	13.9	26.3	0.8	0.4
2	18	18	190	72	R	9.6	40.2	1.9	0.4	10.6	24.8	1.6	0.7
2	18	24	169	70	R	11.7	26.1	1.7	0.6	11.4	19.5	1.7	0.9
2	19	27	185	78	R	7.6	19.7	2.7	1	10.4	20.1	2.2	1.1
2	19	25	169	76	L	13.3	22.3	0.8	0.8	10.2	24.2	1.7	0.5
2	20	24	186	73.5	R	8.6	21.5	1.8	0.7	14.8	27.3	0.8	0.6
2	20	25	180	72	L	6.3	15.7	2.3	1.1	6.6	16.2	2.1	1
2	21	24	175	81	R	11.5	32.2	1.3	0.6	9.8	19.7	2.2	0.8
2	22	26	180	75	R	15.9	21.4	1	0.7	14.8	28.9	1	0.5
2	22	25	189	79	R	9.4	13.7	1.9	1.1	9.2	15.1	2	0.8
2	23	46	179	68	R	7.8	27.8	1.2	0.5	12.3	19.2	1	0.5
2	24	25	186	63	R	12	27.7	1.5	0.6	13.5	29.8	1	0.6
2	26	22	173.5	64	R	9.7	27.6	1.5	0.5	7.6	26.4	2	0.5
2	28	24	175	67	R	7.6	9.2	1.4	1.5	6.7	10.8	2.1	1
2	28	28	182	74	R	12.8	18.5	1.3	1	14.1	23	1.2	0.7
2	24	24	180	65	R	11.8	30.9	1.1	0.4	10.2	24.8	1	0.3
2	21	31	183	69.5	R	15.2	108.6	0.8	0.1	12.1	88.3	1.1	0.1
2	21	47	179	69	R	16.6	31	0.6	0.4	13.4	21.2	1	0.7
2	23	23	173.5	64	R	11.1	22.6	1.1	0.5	10.6	21.2	1.3	0.5
2	27	29	182	74.5	R	12.5	17.9	1	0.7	11.9	18.5	1.3	0.6
2	20	25	182	76	R	12.9	45.1	0.8	0.2	11.1	30.5	1.6	0.5
0	0	25	180	72	R	9.9	20.5	1.8	0.8	10.3	19.9	1.8	0.7
0	0	24	172	76	R	8.6	18.4	2.3	1	9.8	24	1.6	0.6
0	0	25	171.5	62.8	R	9	36	2	0.3	8.9	112.3	1.6	0.1
0	0	23	178.5	76	R	7.9	13.6	2.2	1.1	8.6	13.2	1.9	1
0	0	22	186	79	R	8.9	17.7	1.2	0.9	8.7	22.7	1.7	0.8
0	0	34	184	73	R	11.3	37.4	1.4	0.4	10.7	34.4	1	0.5
0	0	25	178	75.8	R	14.4	27.1	1.5	0.7	12.9	21.3	1.2	0.7
0	0	25	178	74	R	11.6	17.7	1.4	1	9.7	17.5	1.7	0.9
0	0	22	181	93	R	7.9	16	2.7	1.2	8.9	16.7	2.1	1.2
0	0	42	172	86	R	9.3	25.4	0.9	0.4	8.4	18.1	1.8	0.6
